# Supplementary material
Source: MDPI journal article supplement (https://www.mdpi.com/1424-2818/15/3/439)

**Figure S4.** Scheme of the proposed distribution of *Lasiopodomys gregalis* and *L. raddei* and localities used for SDM. Bright colors indicate habitat suitability range of 0.75–1 (cloglog scale), light colors correspond to the range - minimum training sensitivity plus specificity – 0.75. Color scheme: blue - *L. gregalis*, orange - *L. raddei*, olive - suitable habitats overlap.

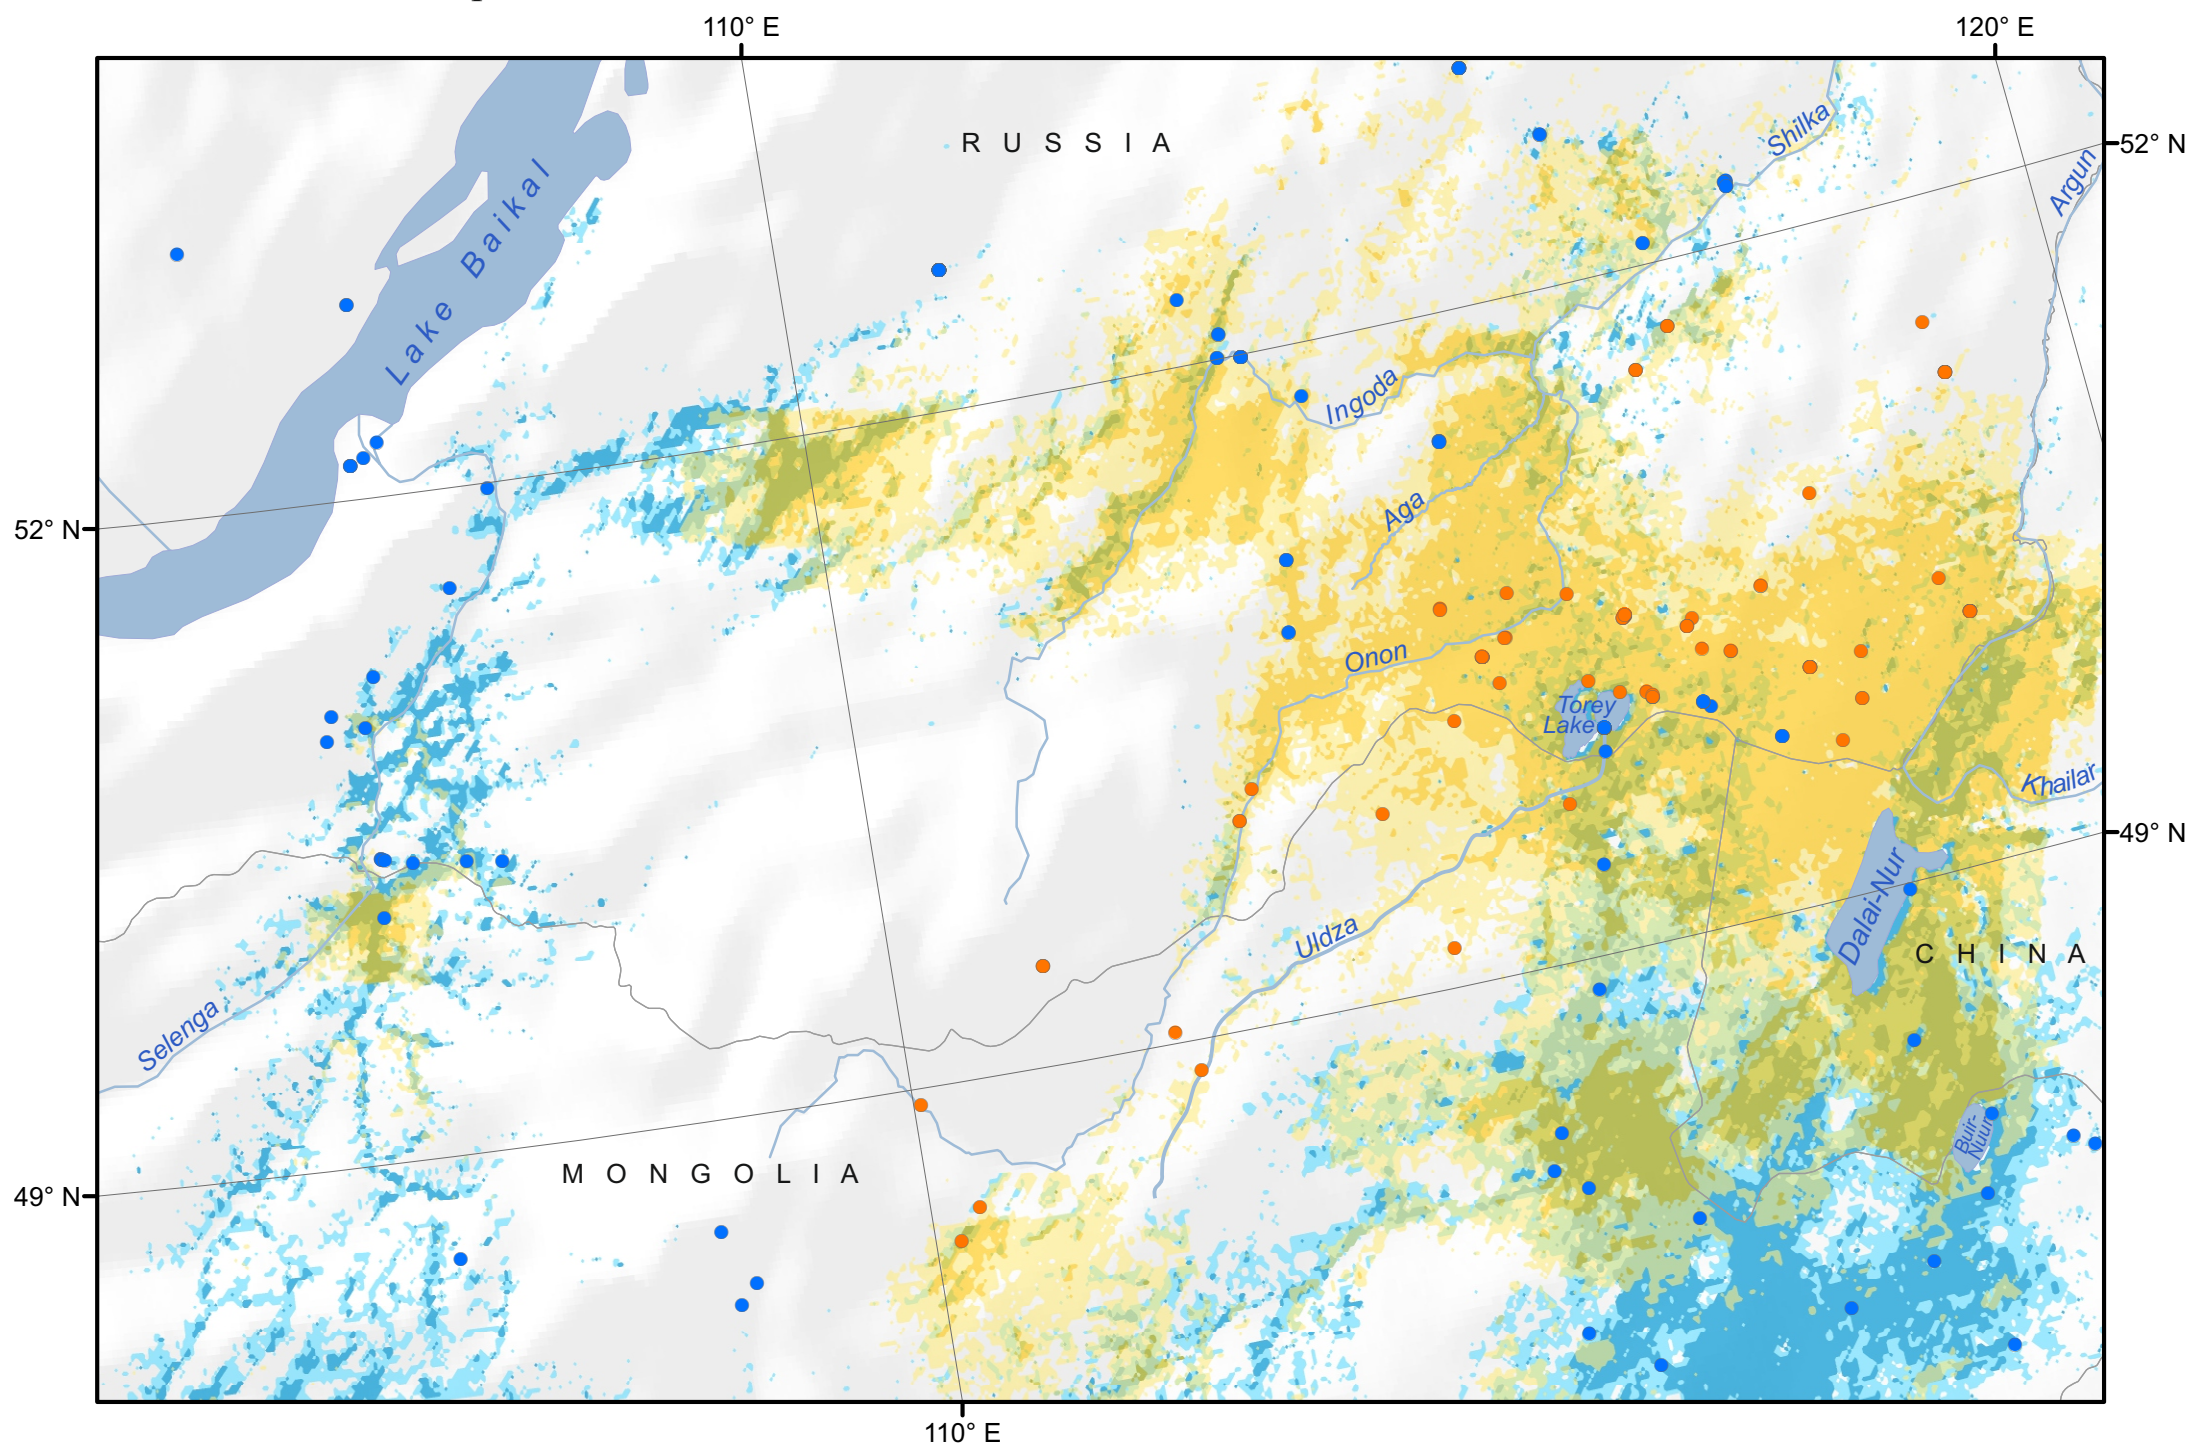

Supplement: s1 [file s1]
