# Supplementary material
Source: MDPI journal article supplement (https://www.mdpi.com/1424-2818/15/3/439)

**Figure S1.** Occurrence records used for species distribution modeling of *Lasiopodomys gregalis* and *L. raddei*. Initial dataset is labeled in color (blue - *L. gregalis*, orange - *L. raddei*). The training sample obtained after filtering (see M&M section 2.6.2) is circled in white.

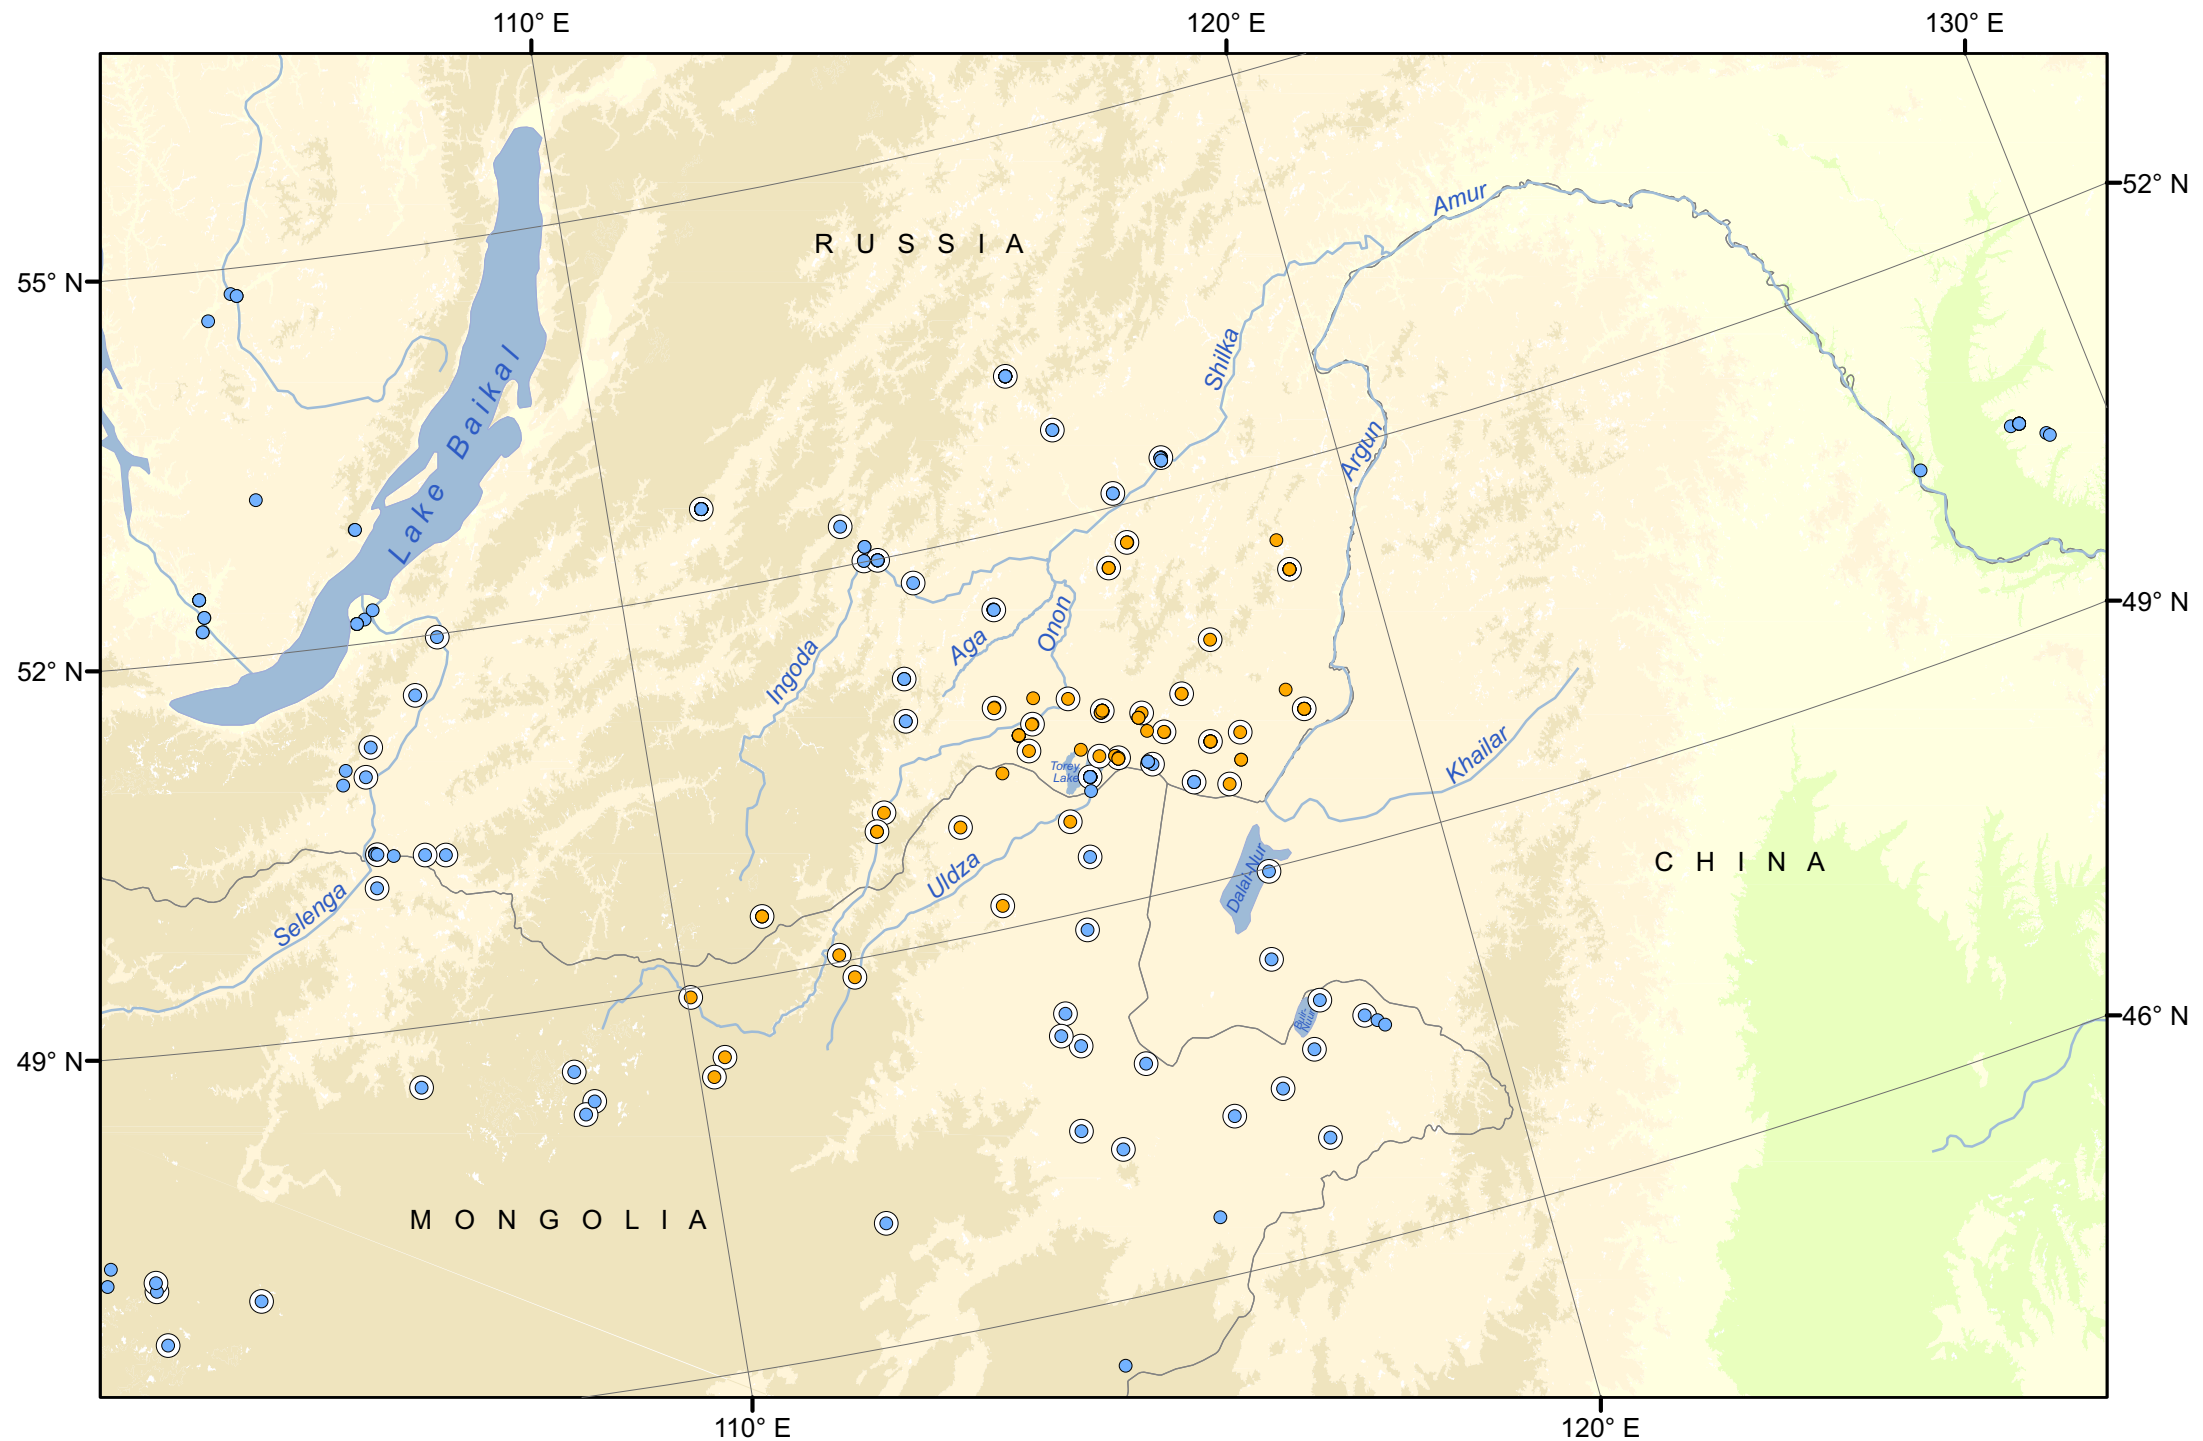

Supplement: s1 [file s1]
