# Supplementary material
Source: MDPI journal article supplement (https://www.mdpi.com/1424-2818/15/3/439)

**Figure S2.** Detecting the number of clusters of individuals. **A.** STRUCTURE Harvester (Earl and von Holdt, 2012) plot of mean likelihood  $L(K)$  and variance per  $K$  value. **B.** Evanno et al. (2005) plot for detecting the number of  $K$  groups.

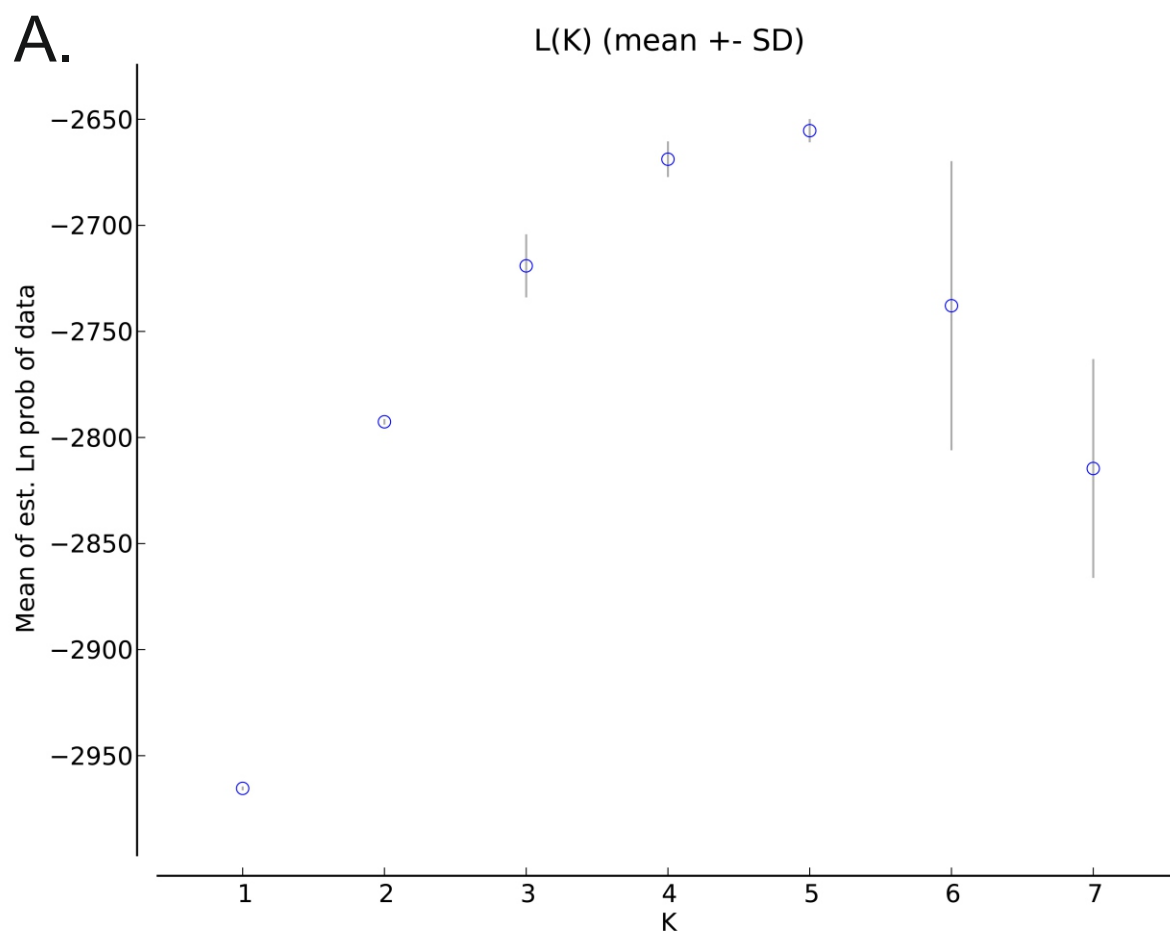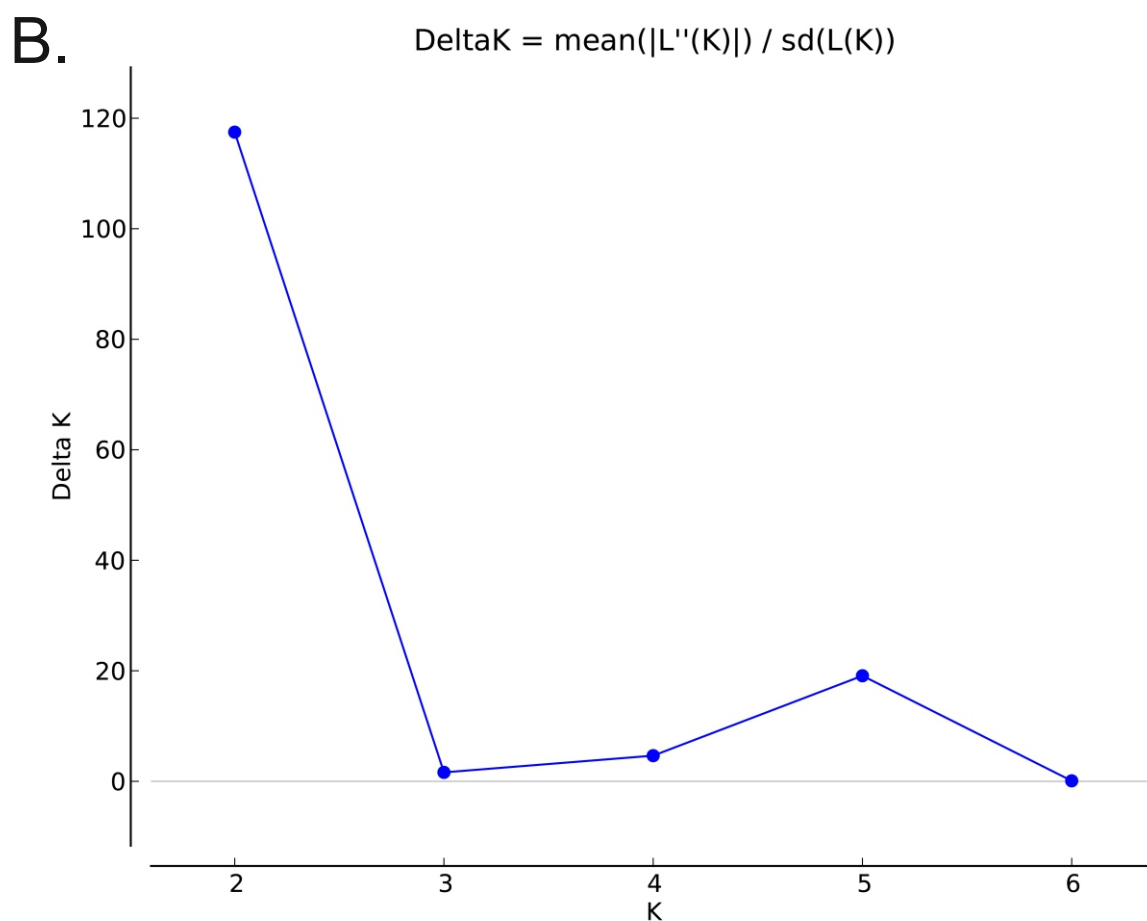

Supplement: s1 [file s1]
