# Supplementary material
Source: MDPI journal article supplement (https://www.mdpi.com/1424-2818/15/3/439)

**Figure S3.** Suitable ranges in shared factors values of *L. gregalis* and *L. raddei*.

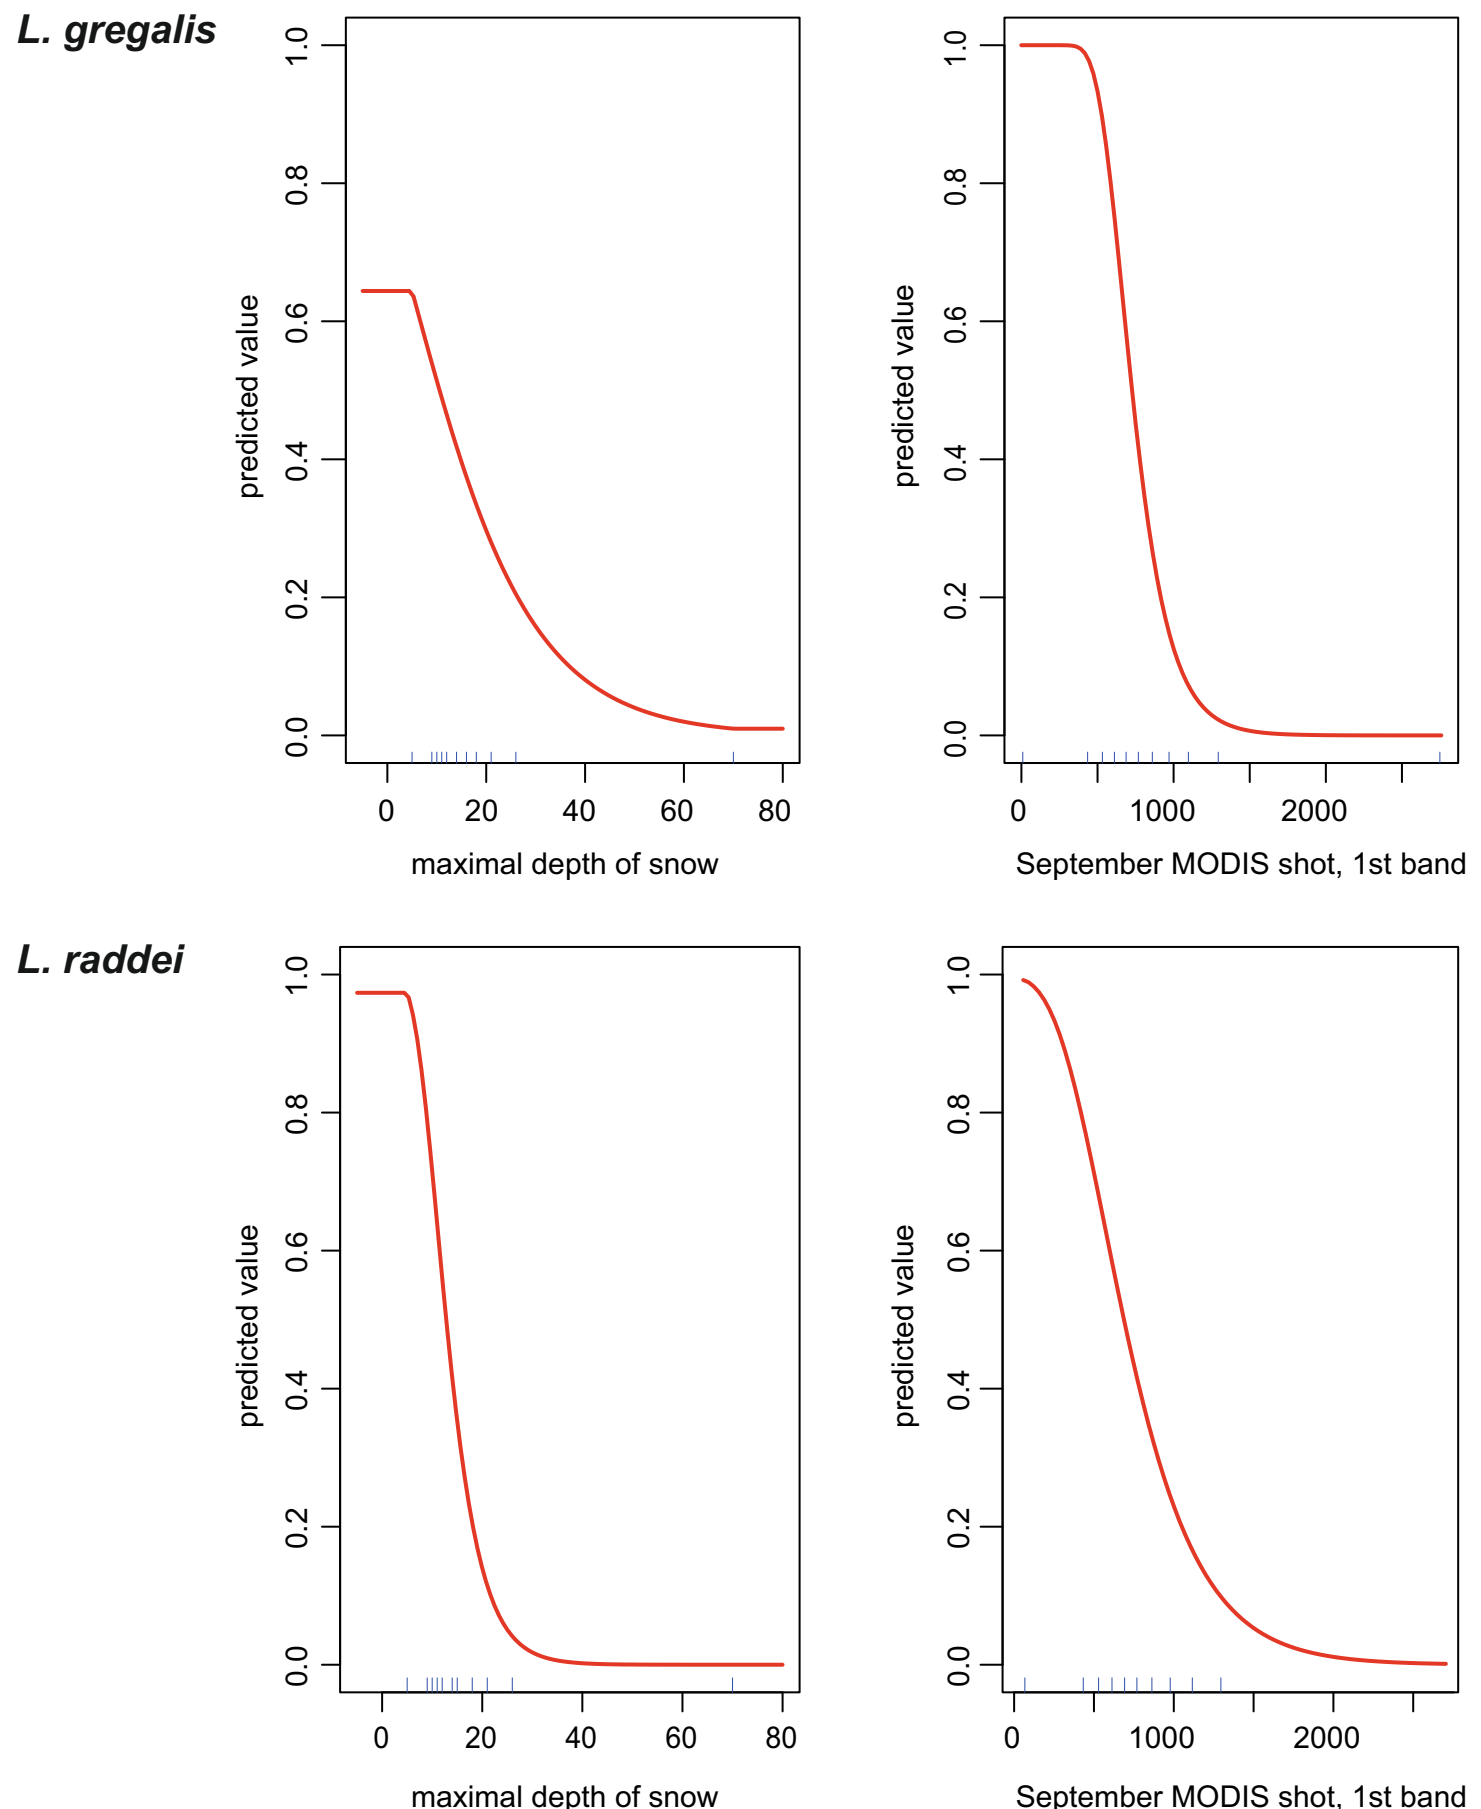

Supplement: s1 [file s1]
